# Supplementary material for: Preparation and Characterization of Silica-Based Ionogel Electrolytes and Their Application in Solid-State Lithium Batteries
Source: MDPI journal article supplement (doi:10.3390/polym15173505), 2023-08-22
Supplement: s1 [file s1]

Table S1. Cyclic discharging and charging test (discharge capacity) of CR2032 coin cell assembled with ionogels electrolyte.

| <b>Sample code</b> | <b>Cycle 2</b> | <b>Cycle 5</b> | <b>Cycle 10</b> |
|--------------------|----------------|----------------|-----------------|
|                    | <b>(mAh/g)</b> | <b>(mAh/g)</b> | <b>(mAh/g)</b>  |
| <b>SIEM2</b>       | 108.7          | 77.1           | 43.5            |
| <b>SIEM4</b>       | 95.6           | 65.0           | 32.5            |
| <b>SIEM6</b>       | 76.5           | 54.5           | 25.2            |
